# Supplementary material for: Single-step synthesis of hierarchical BxCN: a metal-free catalyst for low-temperature oxidative dehydrogenation of propane
Source: Royal Society of Chemistry journal article supplement (doi:10.1039/c6ta06972j), 2016-01-01
Supplement: c6ta06972j1.pdf [file c6ta06972j1.pdf]

## Supporting Information

### Single step synthesis of hierarchical B<sub>x</sub>CN: A metal free catalyst for Low Temperature Oxidative dehydrogenation of Propane

Reena Goyal,<sup>a</sup> Bipul Sarkar,<sup>a</sup> Arijit Bag,<sup>b</sup> Frederic Lefebvre,<sup>c</sup> Siddharth Sameer,<sup>a</sup> Chandrashekar Pendem,<sup>a</sup> and Ankur Bordoloi\*<sup>a</sup>

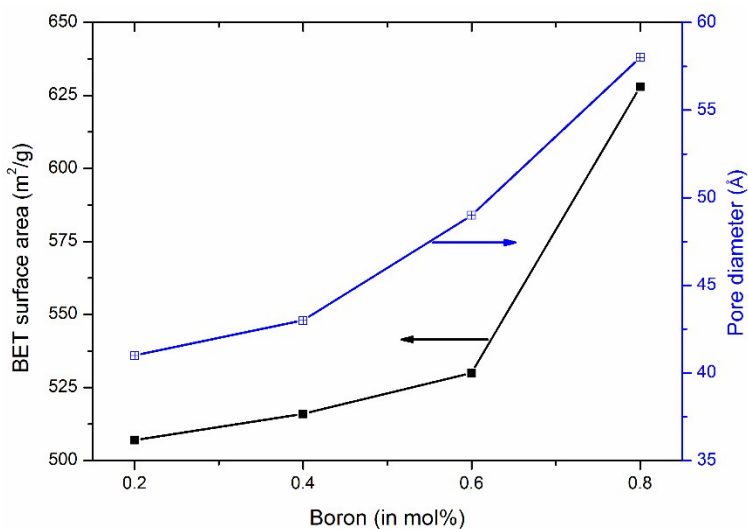

**Figure S1.** Boron content with BET surface area (m<sup>2</sup>/g) and average pore diameter (nm).

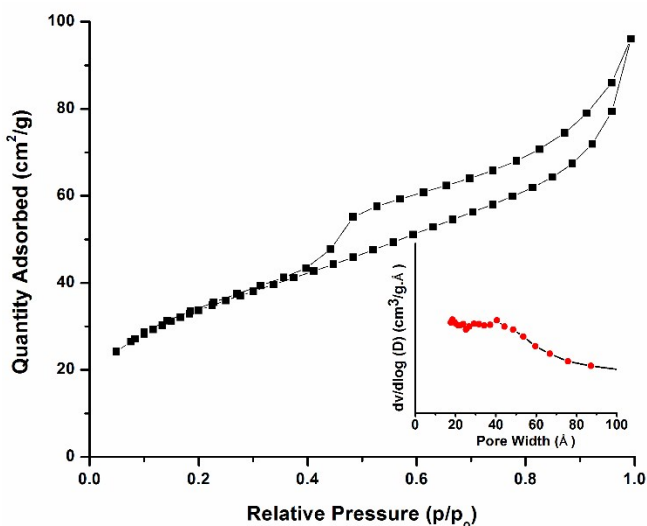

**Figure S2.** N<sub>2</sub> adsorption-desorption isotherm and BJH plot of pore size distribution (inset).

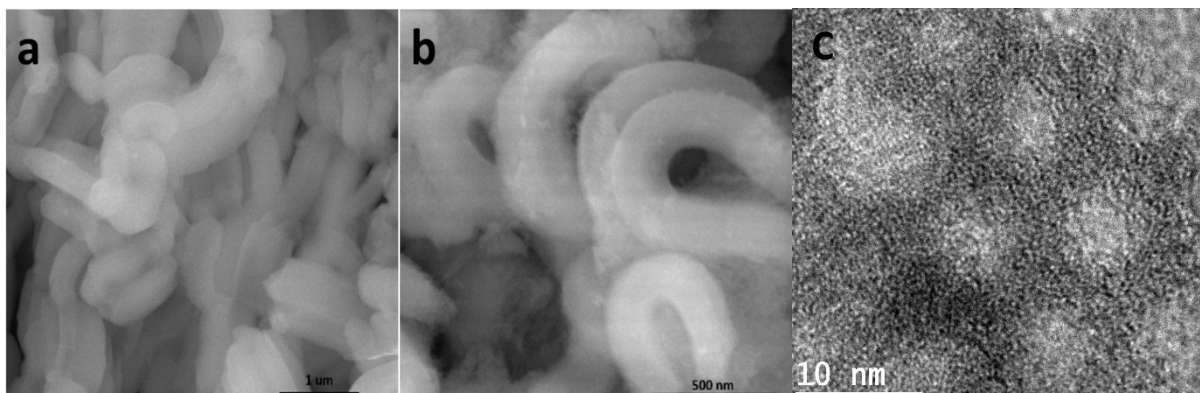

**Figure S3.** SEM and HRTEM images of SBA-15.

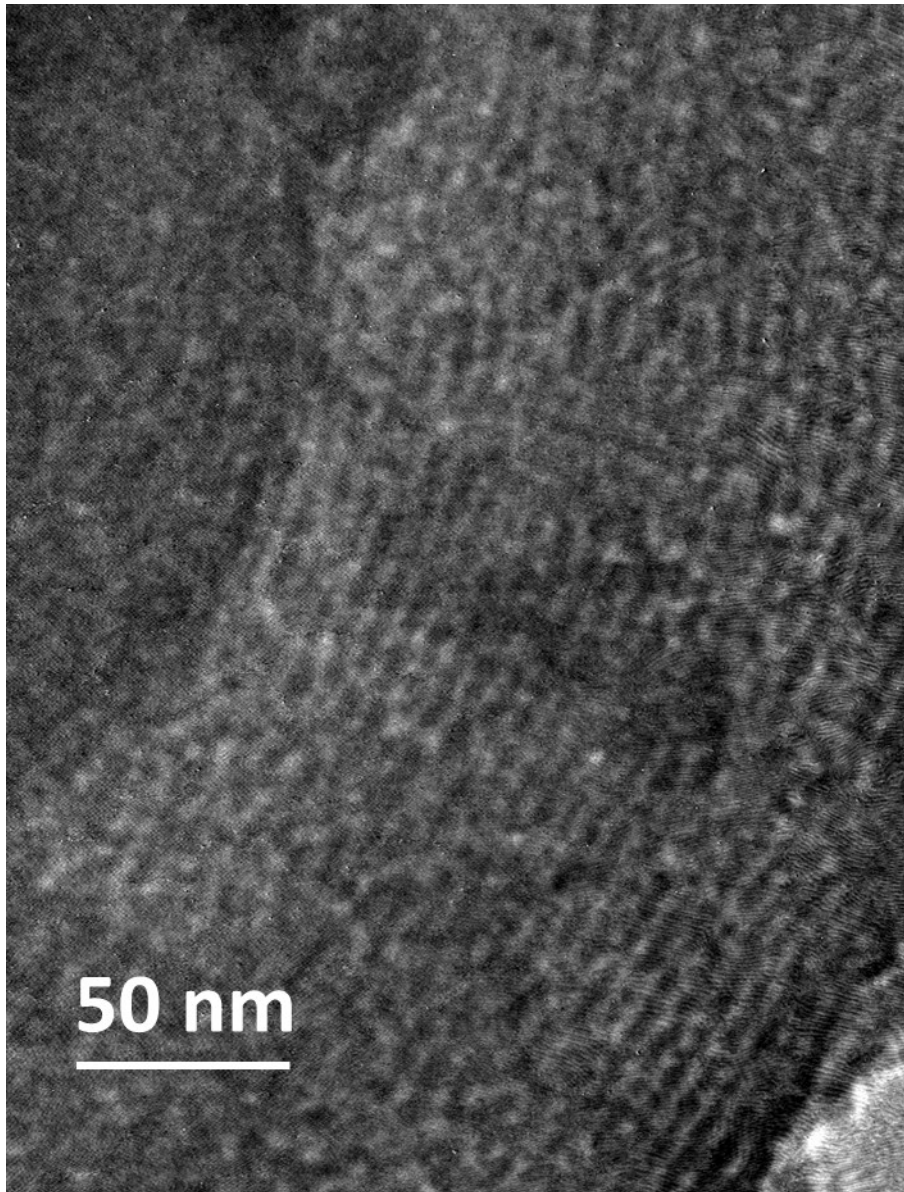

Figure S4. High resolution TEM image of BxCN material showing graphitic tubular network.

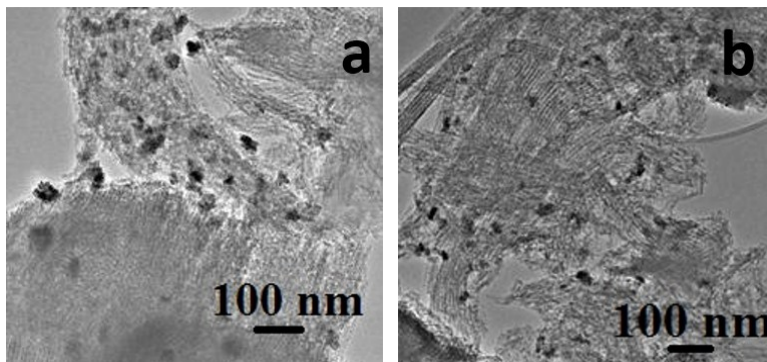

Figure S5. HRTEM images of TBCN papered using tri-ethyl borane.

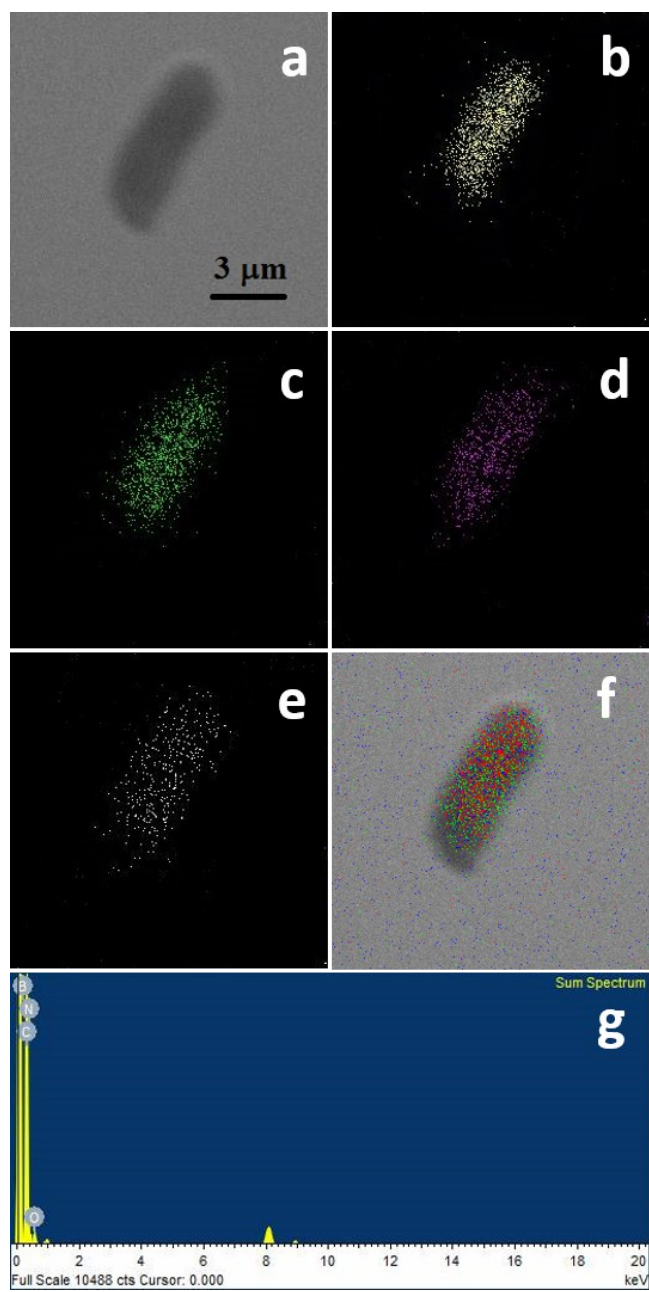

**Figure S6.** E-mapping (a-f) and EDAX (g) pattern of BxCN; (b) Carbon, (c) Nitrogen, (d) Oxygen, (e) Boron and (f) combined.

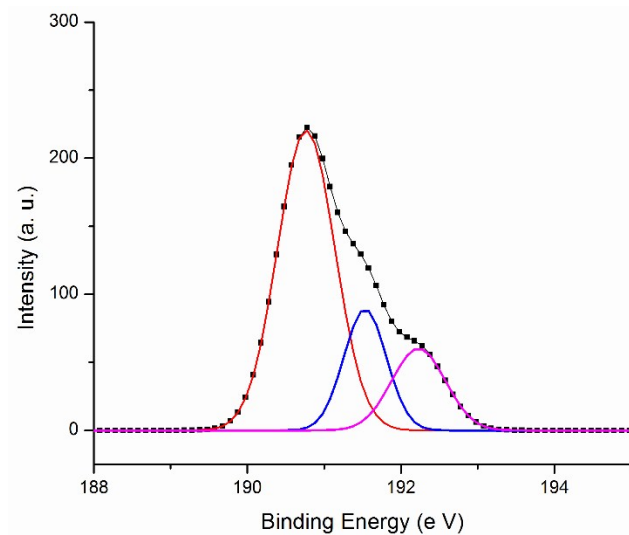

**Figure S7.** X-ray photoelectron spectroscopy of BxCN papered using tri-ethylborane.

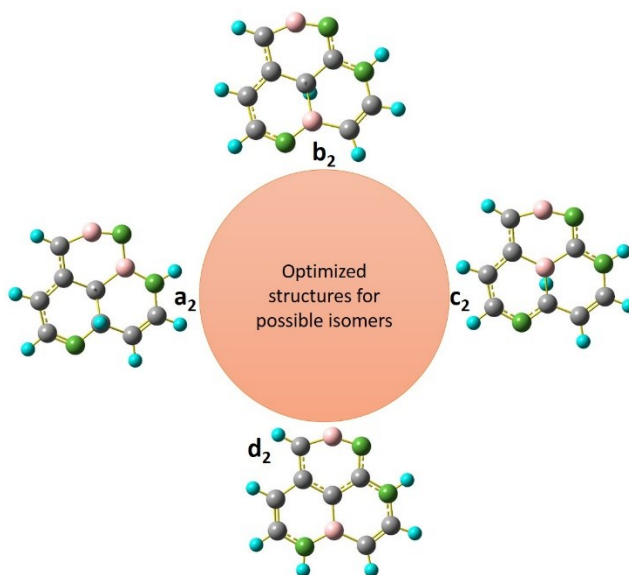

**Figure S8.** DFT-optimized di- substituted B<sub>x</sub>N<sub>y</sub>C<sub>z</sub> structures four possible isomers.

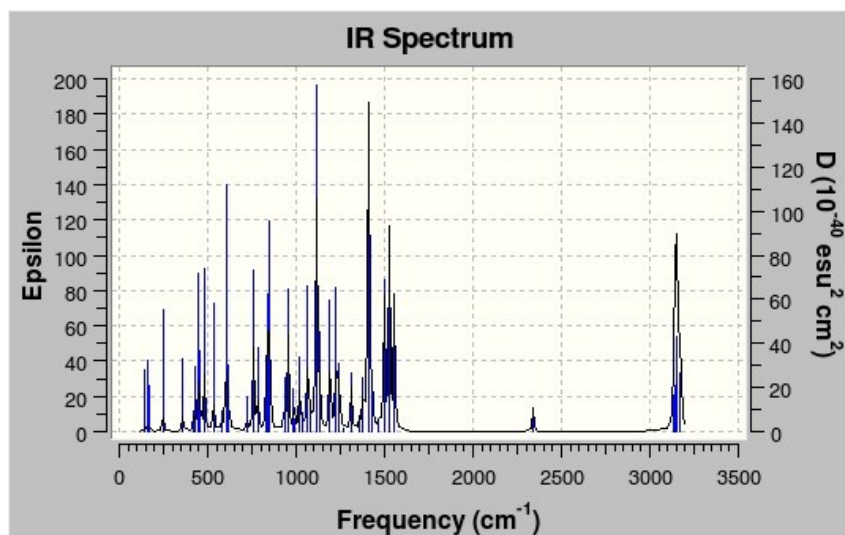

Figure S9. Computed IR spectra for the  $e_1$  isomer.

$a_1$

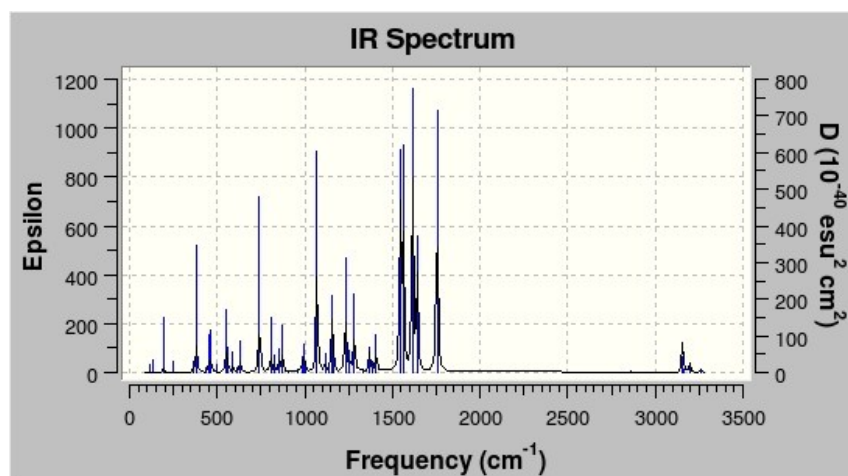

$a_2$

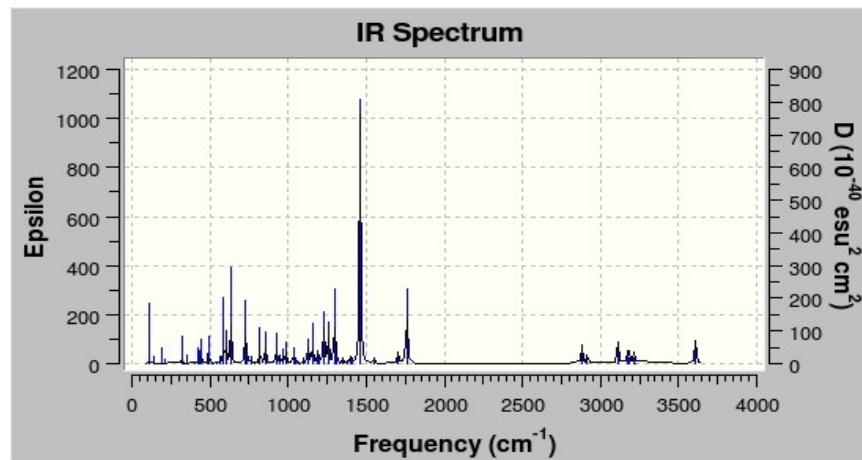

b<sub>1</sub>

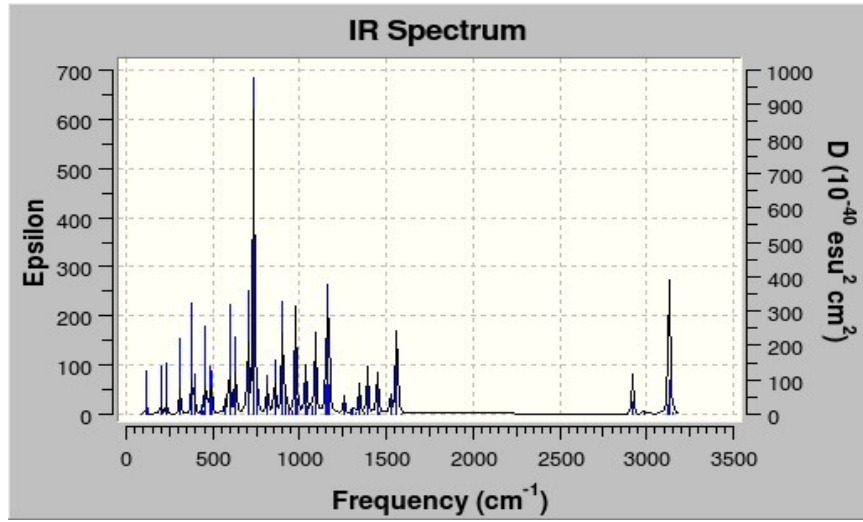

b<sub>2</sub>

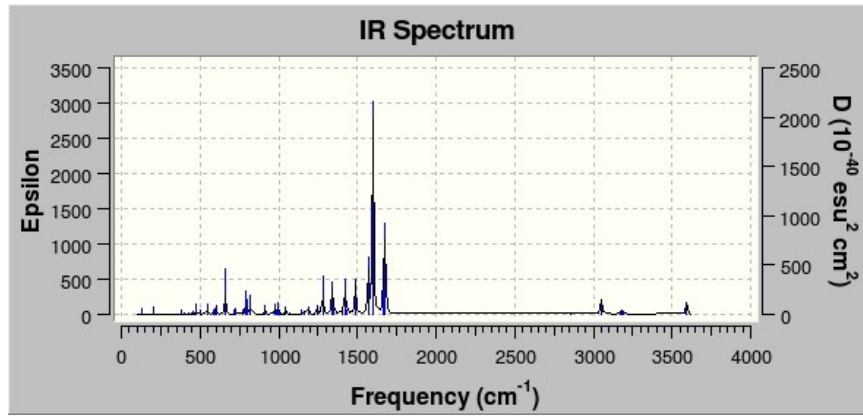

c<sub>1</sub>

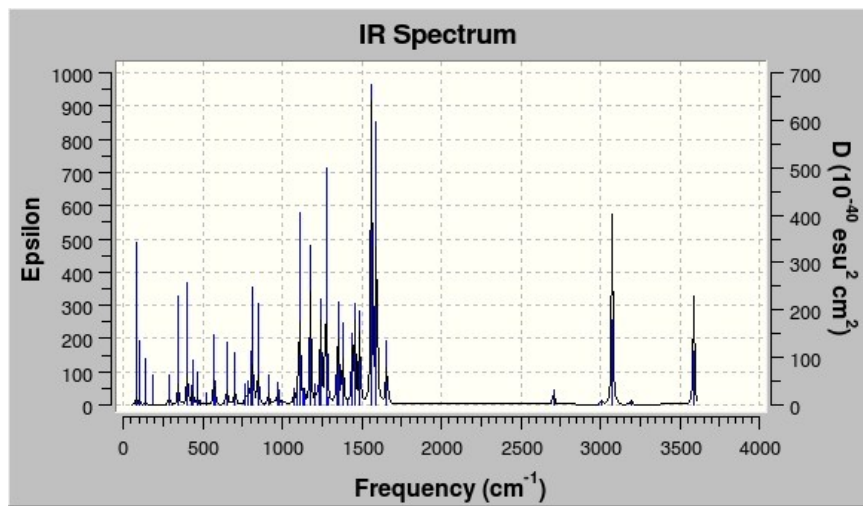

c<sub>2</sub>

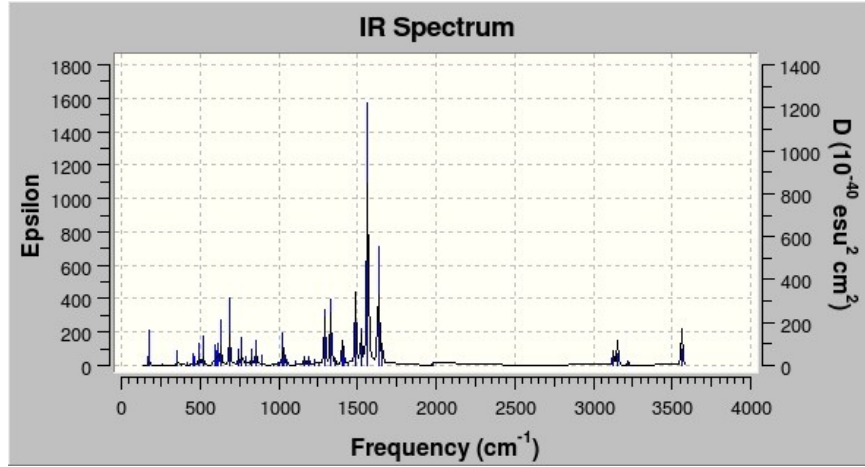

d<sub>1</sub>

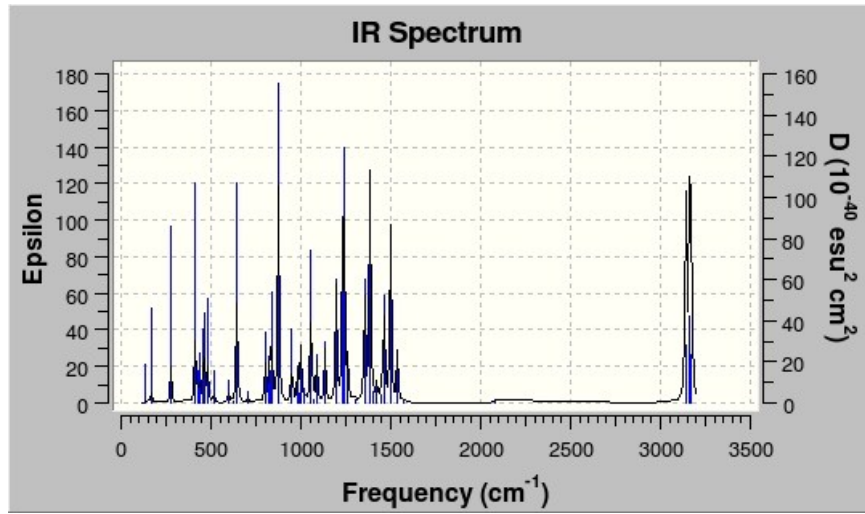

d<sub>2</sub>

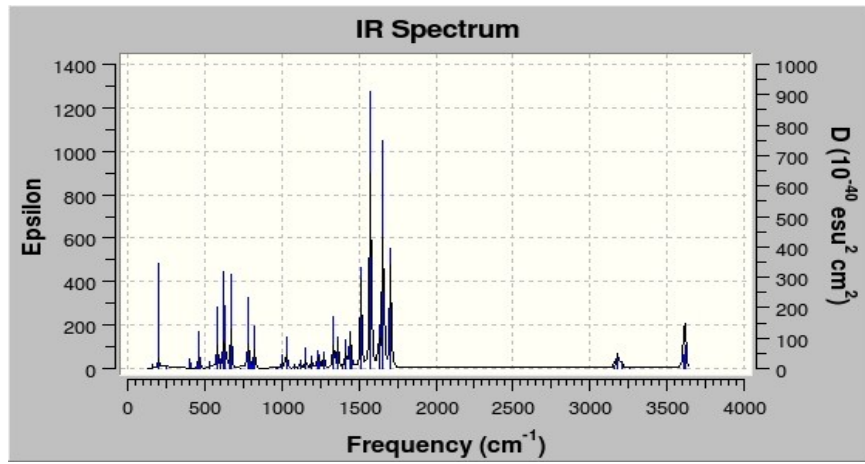



f<sub>1</sub>

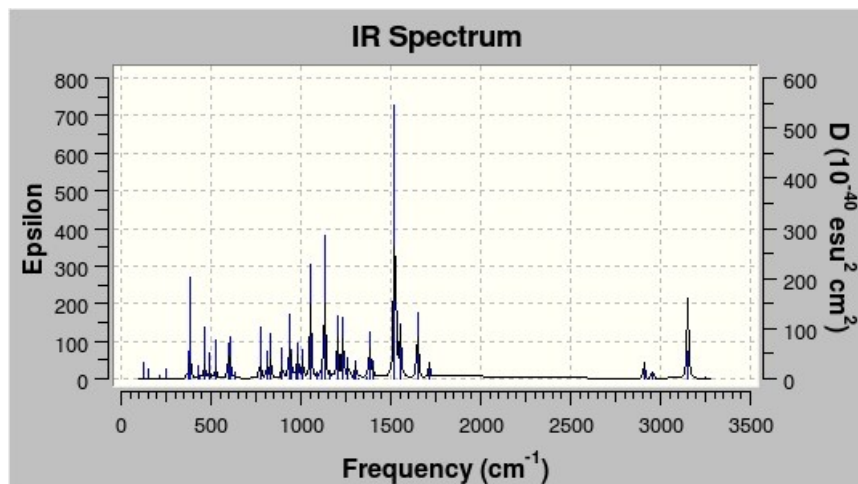

g<sub>1</sub>

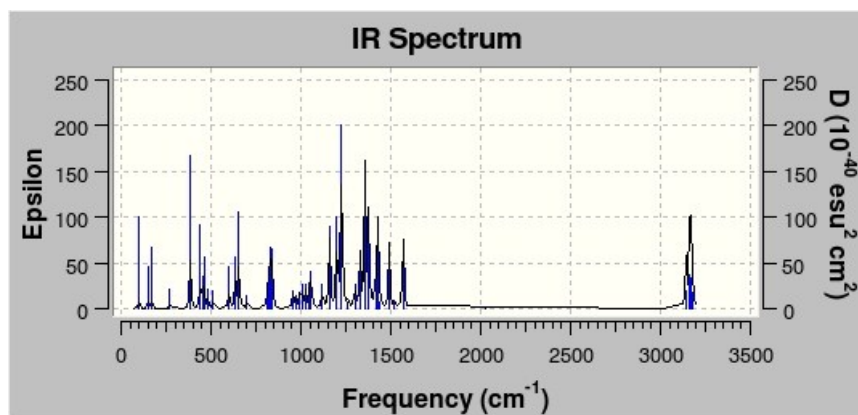

Figure 10. Computed spectra of IR of different possible structures (excluding e<sub>1</sub>, which is listed in Figure xx).

a<sub>1</sub>

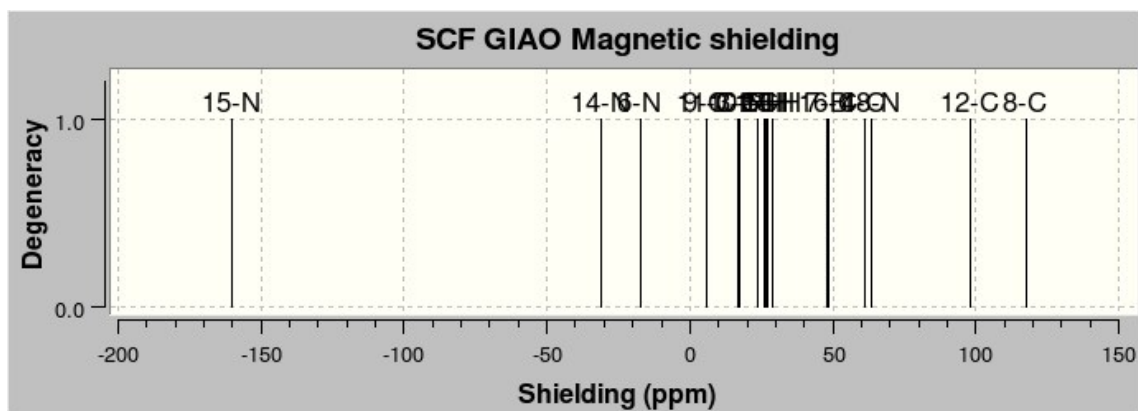

a<sub>2</sub>

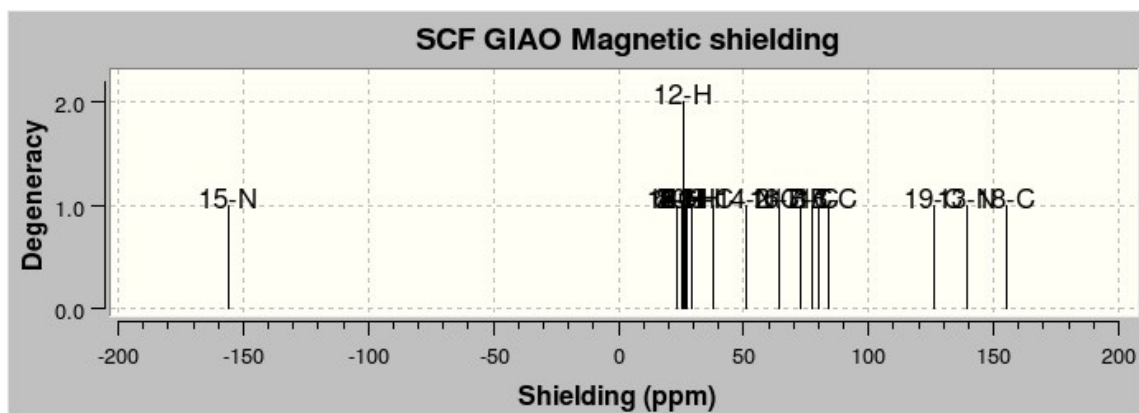

b<sub>1</sub>

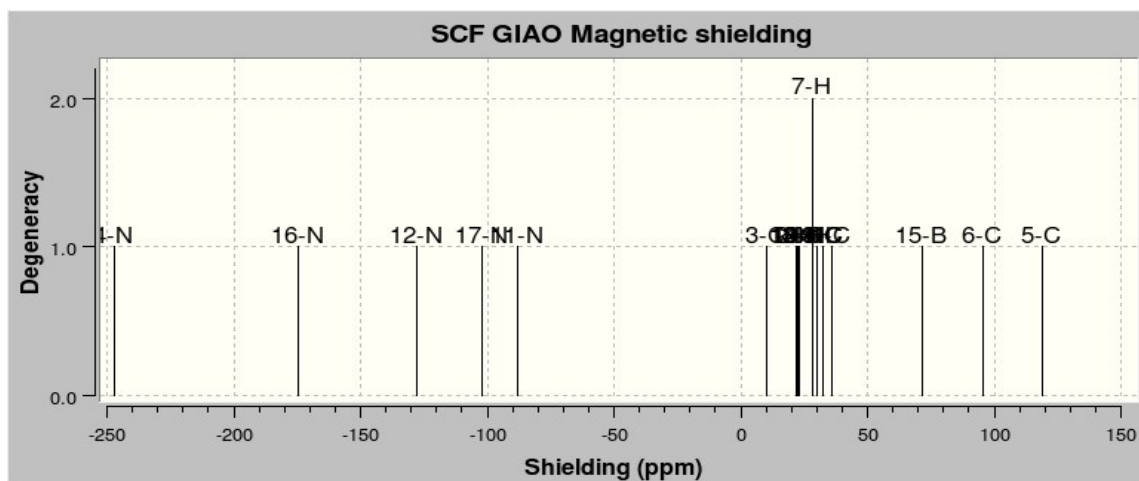

b<sub>2</sub>

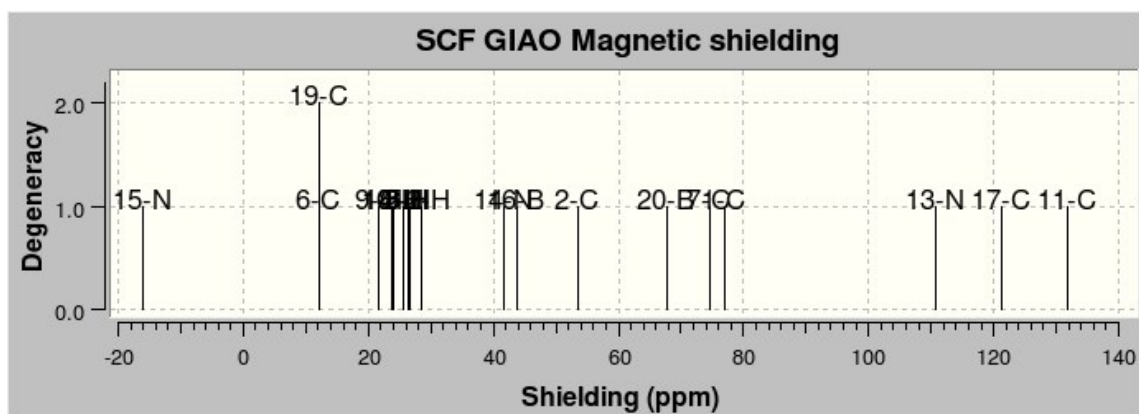

c<sub>1</sub>

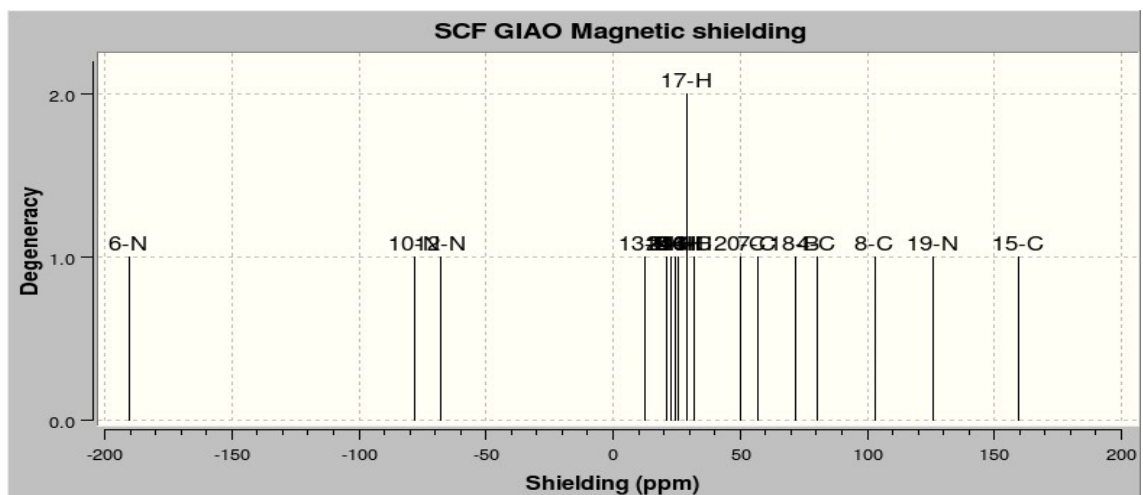

c<sub>2</sub>

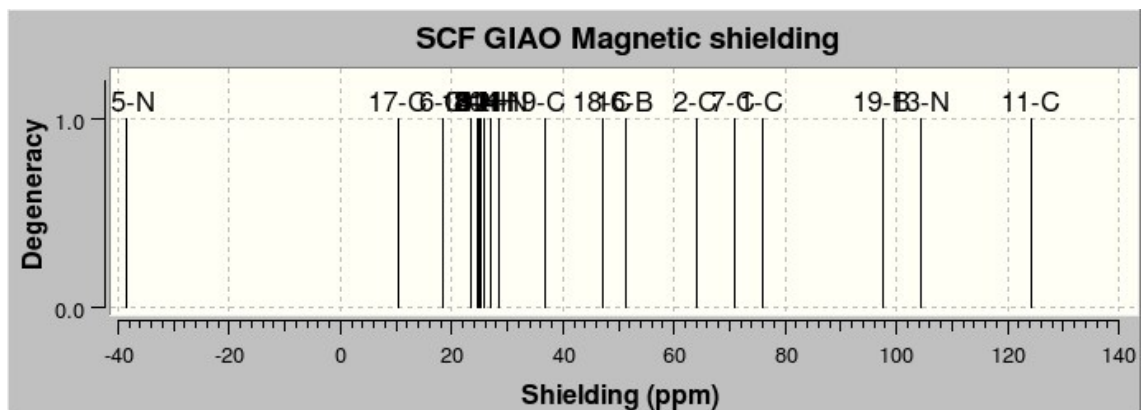

d<sub>1</sub>

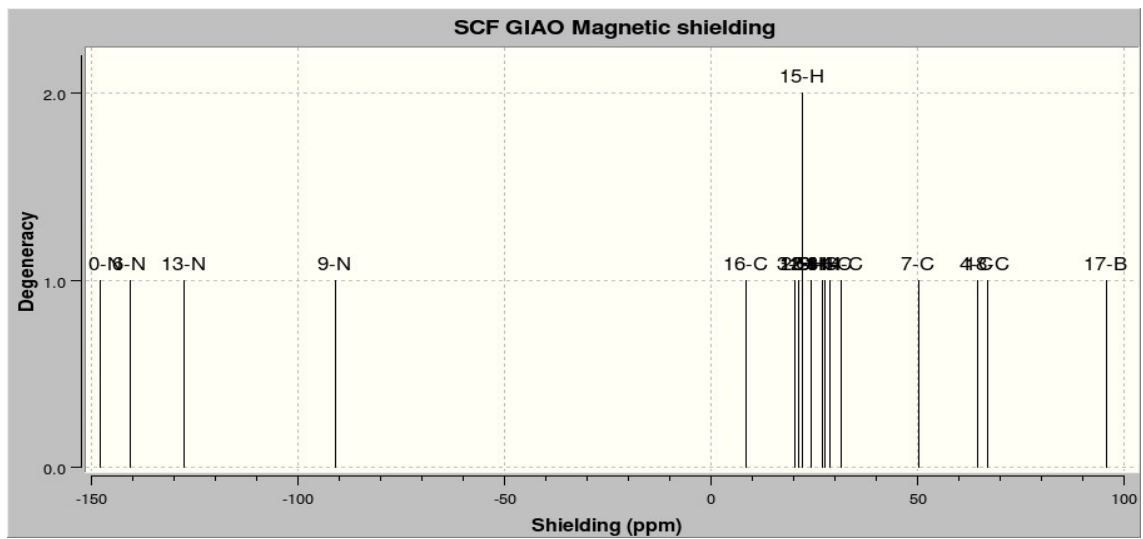

d<sub>2</sub>

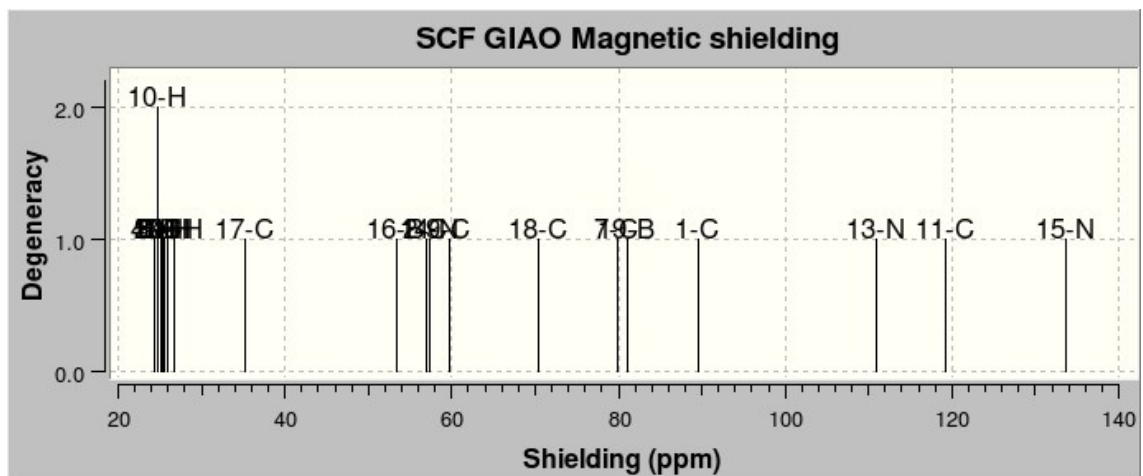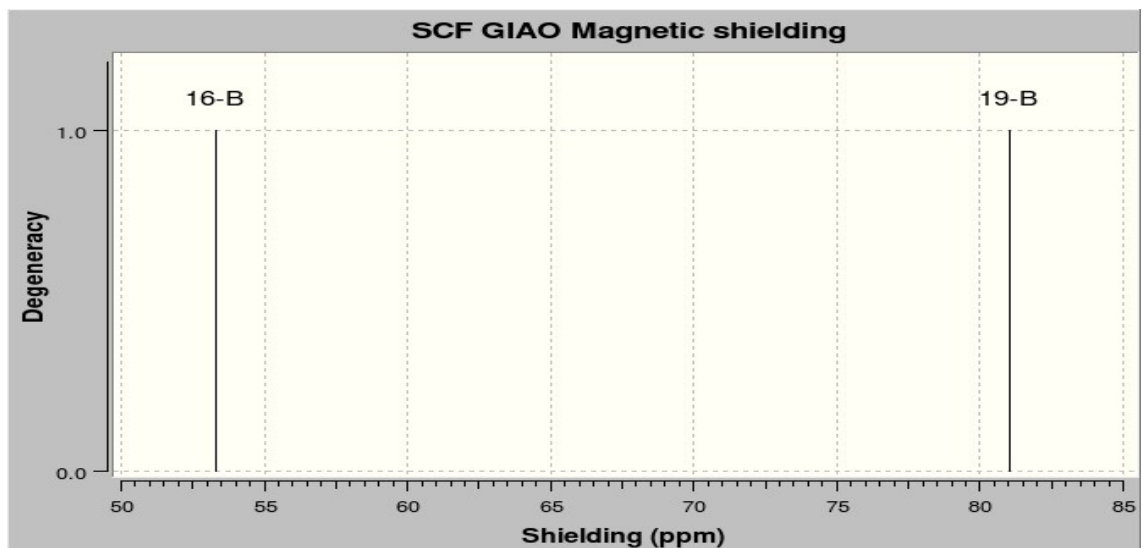

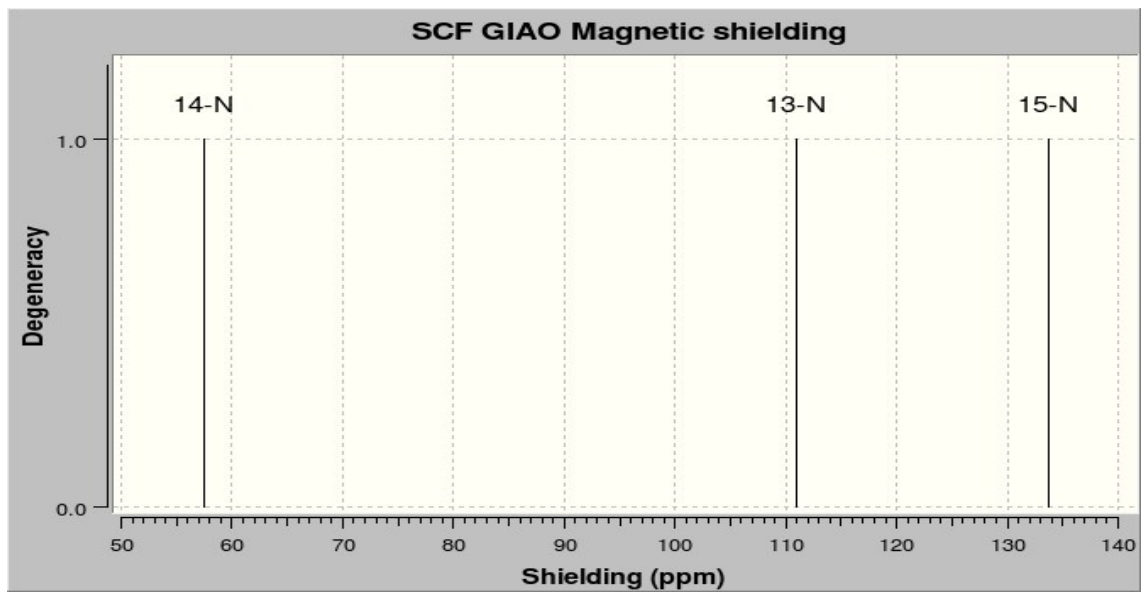

$e_1$

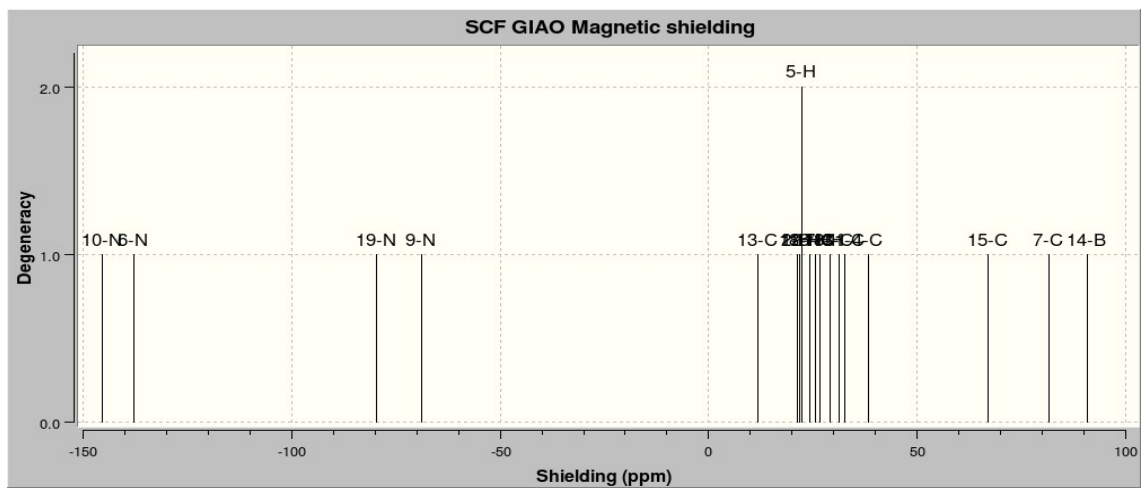

$f_1$

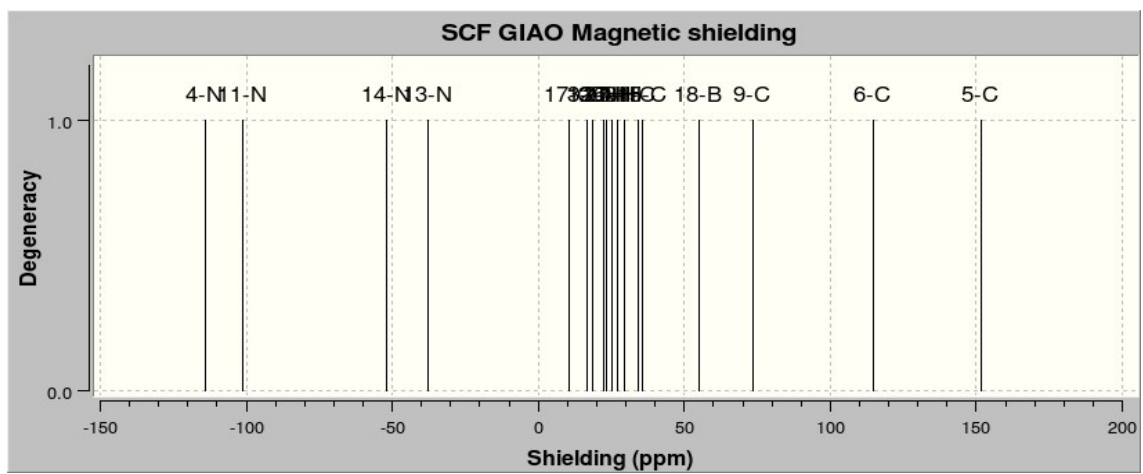

**g<sub>1</sub>**

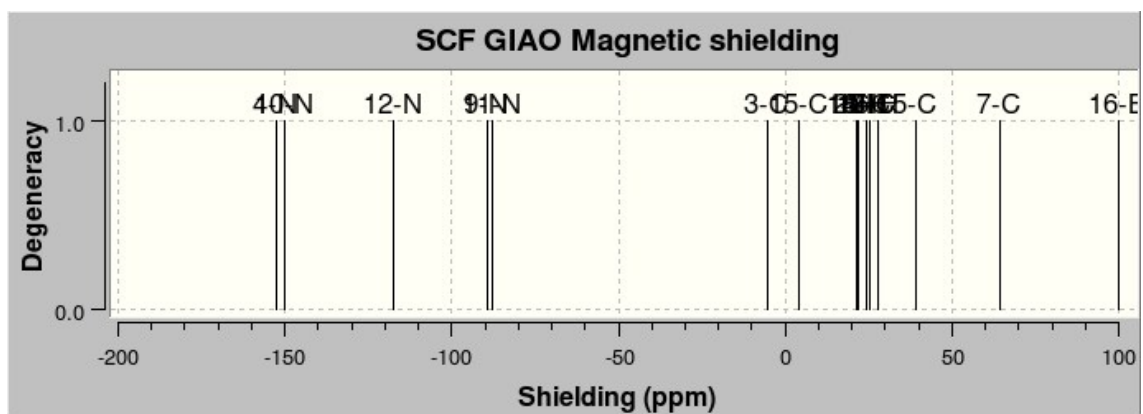

**Figure S11.** Computed spectra of NMR of different possible structures.

**a<sub>1</sub>**

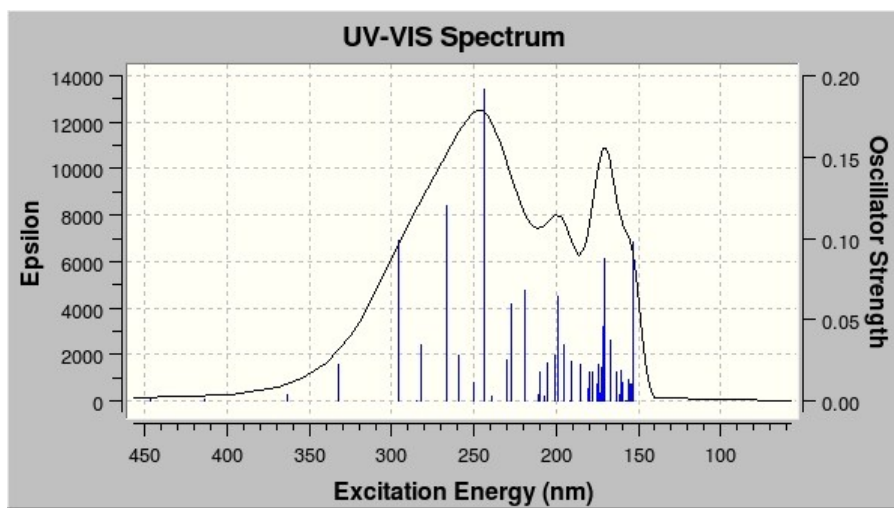

**a<sub>2</sub>**

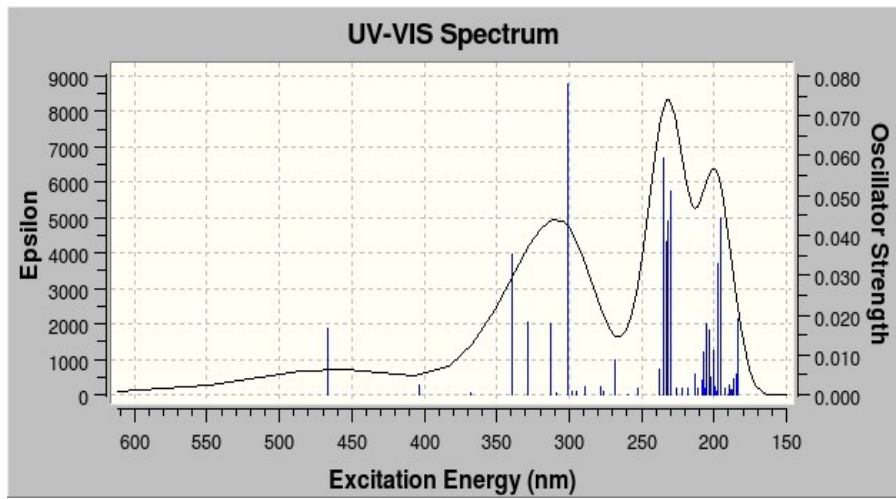

$b_1$

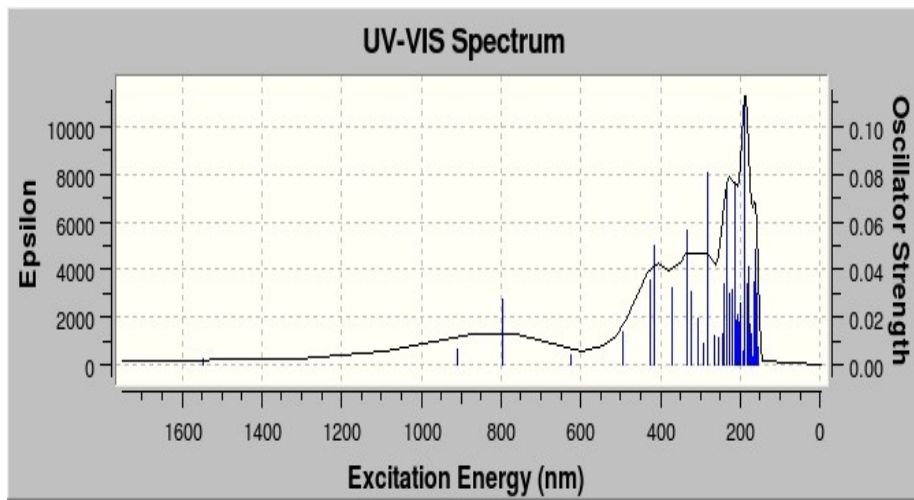

$b_2$

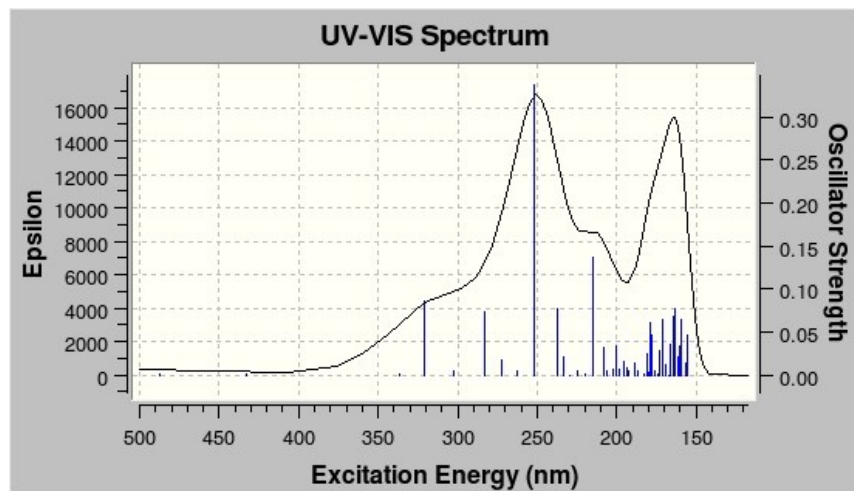

$c_1$

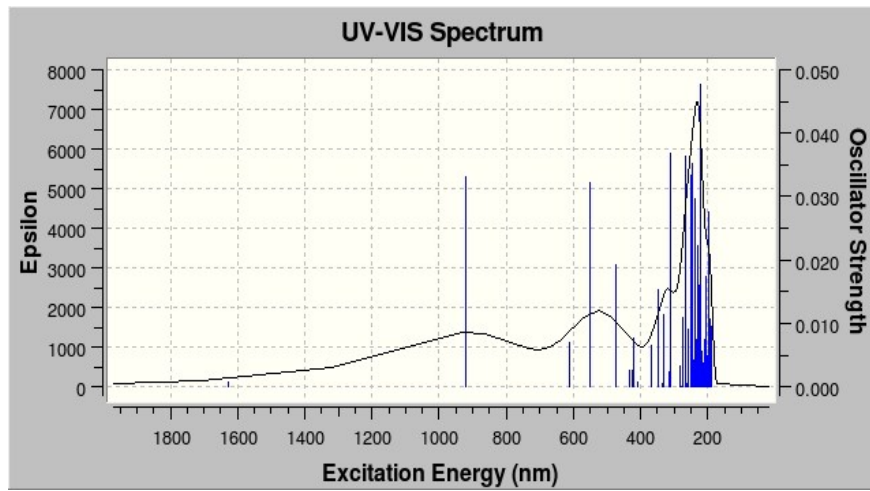

$c_2$

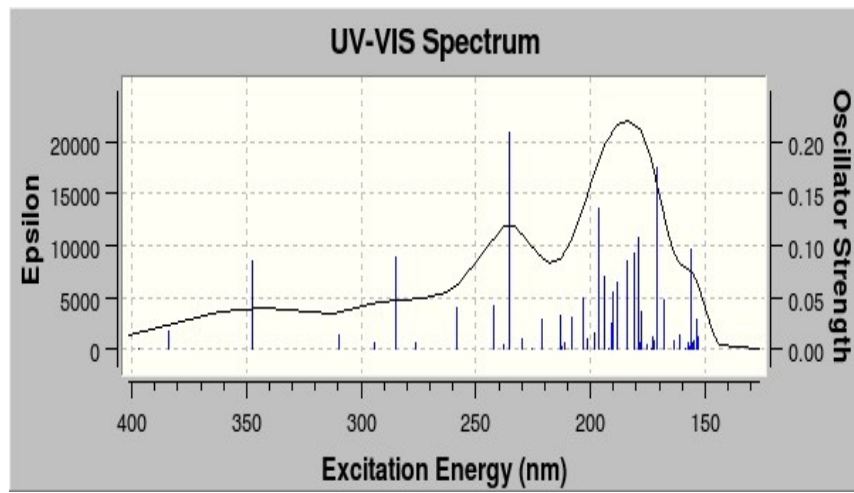

$d_1$

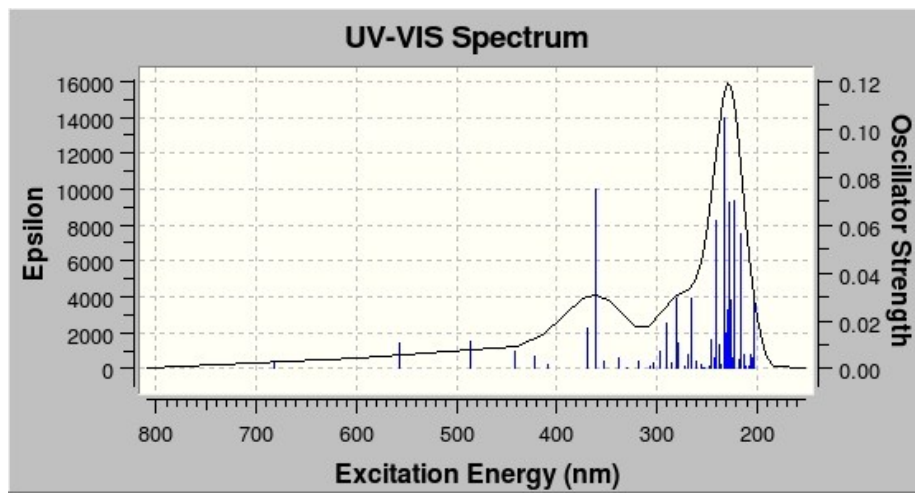



$d_2$

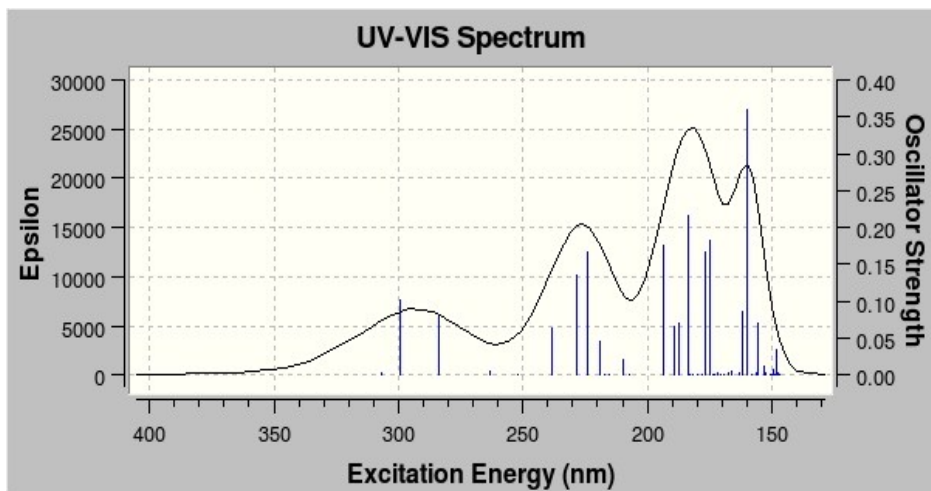

$e_1$

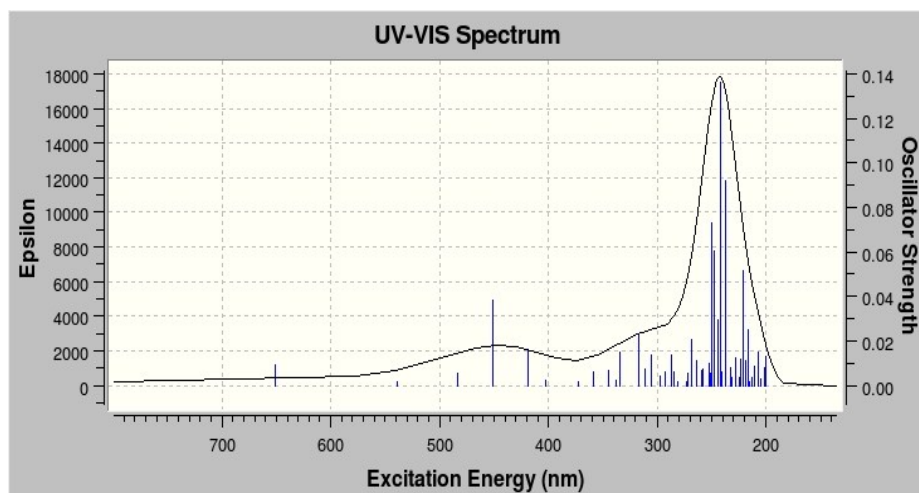

$f_1$

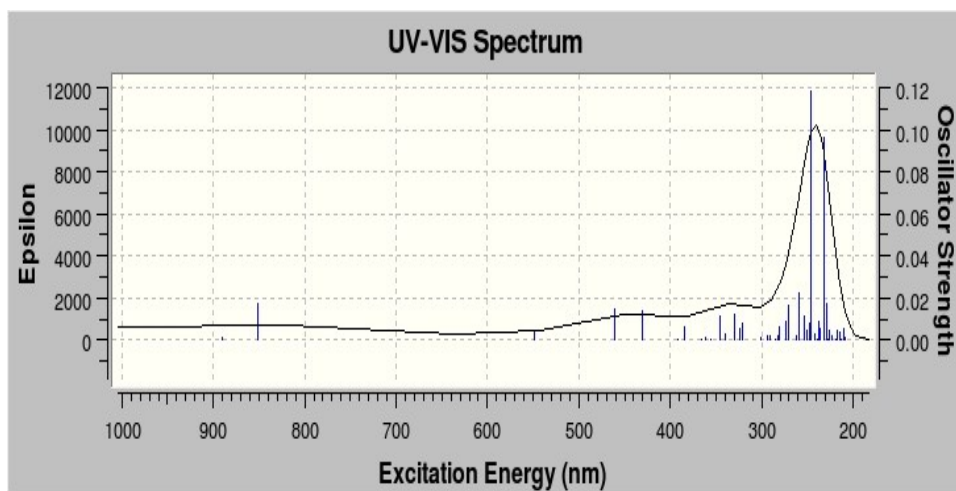

S<sub>1</sub>

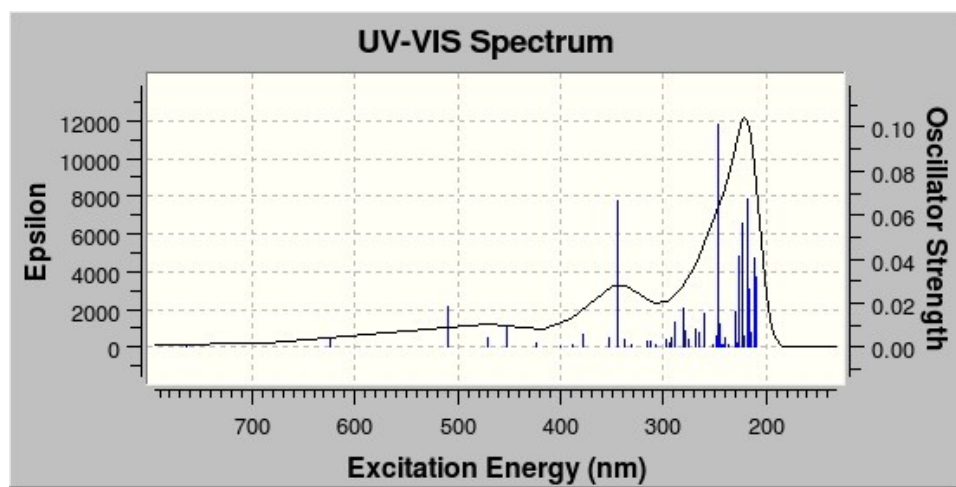

Figure S12. Computed spectra of UV of different possible structures.

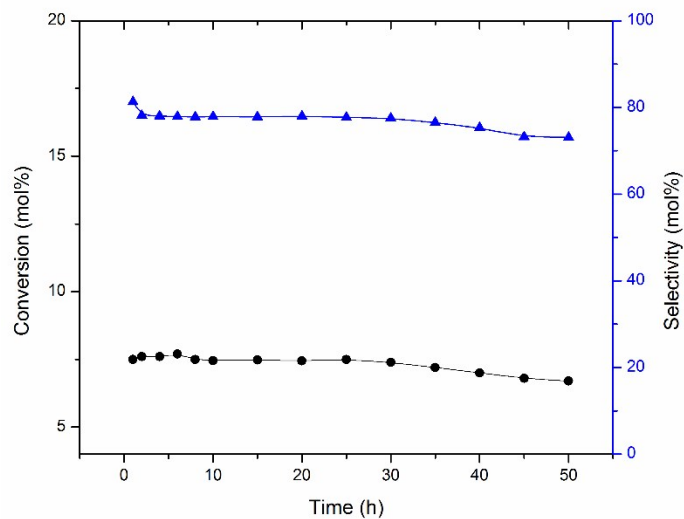

**Figure S13.** Catalytic activity during time on steam over 0.4BxCN catalyst. [Reaction condition: 0.1 g catalyst, C<sub>3</sub>H<sub>8</sub>:O<sub>2</sub>: He of 2:2:9, temp. =350°C, GHSV=2000 ml g<sup>-1</sup> h<sup>-1</sup>]

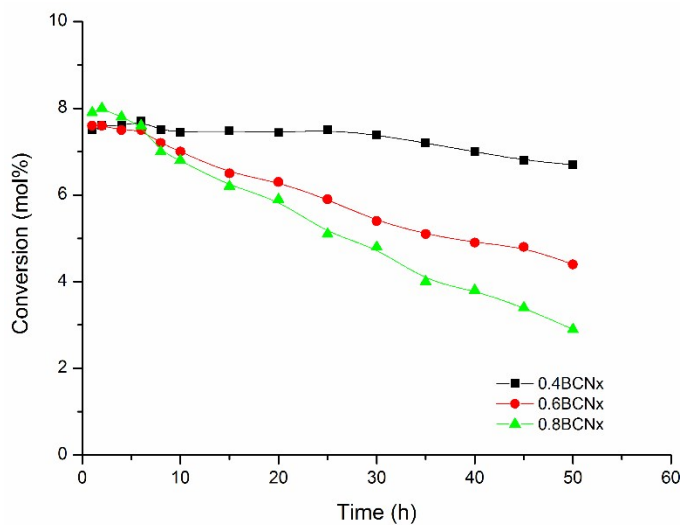

**Figure S14.** Catalytic activity during time on steam with different boron content. [Reaction condition: 0.1 g catalyst, C<sub>3</sub>H<sub>8</sub>:O<sub>2</sub>: He of 2:2:9, temp. =350°C, GHSV=2000 ml g<sup>-1</sup> h<sup>-1</sup>]

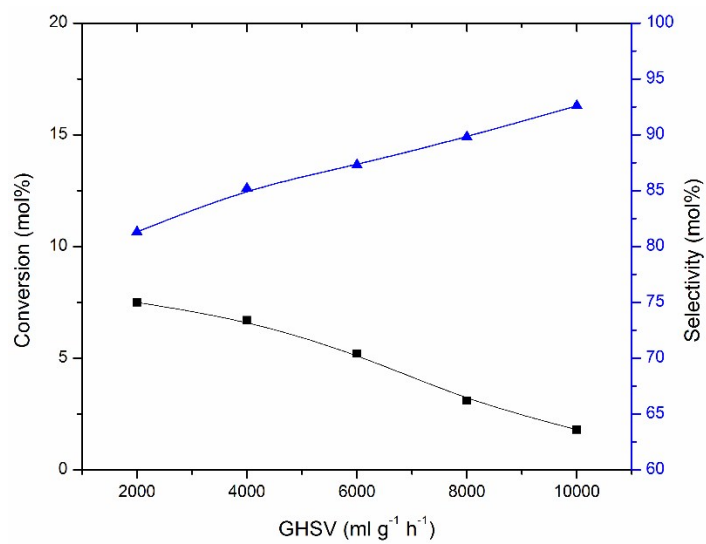

**Figure S15.** Catalytic activity during oxidative dehydrogenation of propane as a function of GHSV. [Reaction condition: 0.1 g catalyst, C<sub>3</sub>H<sub>8</sub>:O<sub>2</sub>: He of 2:2:9, TOS=1h, temp. =350°C]

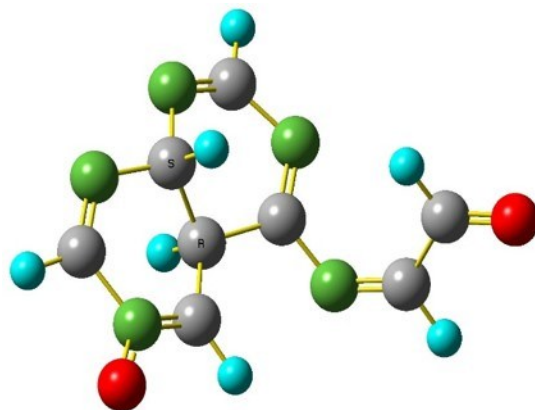

**Figure S16.** Oxidized product of boron free catalyst
